# Supplementary material for: Air Pollution and Mortality in Seven Million Adults: The Dutch Environmental Longitudinal Study (DUELS)
Source: PubMed Central journal article supplement (PMC4492265; doi:10.1289/ehp.1408254), 2015-03-11
Supplement: ehp.1408254.s001.acco.pdf [file ehp.1408254.s001.acco.pdf]

**Note to Readers:** *EHP* strives to ensure that all journal content is accessible to all readers. However, some figures and Supplemental Material published in *EHP* articles may not conform to 508 standards due to the complexity of the information being presented. If you need assistance accessing journal content, please contact [ehp508@niehs.nih.gov](mailto:ehp508@niehs.nih.gov). Our staff will work with you to assess and meet your accessibility needs within 3 working days.

## Supplemental Material

### **Air Pollution and Mortality in Seven Million Adults: The Dutch Environmental Longitudinal Study (DUELS)**

Paul H. Fischer, Marten Marra, Caroline B. Ameling, Gerard Hoek, Rob Beelen, Kees de Hoogh, Oscar Breugelmans, Hanneke Kruize, Nicole A.H. Janssen, and Danny Houthuijs

#### Table of Contents

**Table S1.** Age and sex adjusted mean PM<sub>10</sub> and NO<sub>2</sub> concentrations (µg/m<sup>3</sup>) at 4-digit postal code level for selected socio-demographic characteristics among participants of the 2003 to 2005 surveys of 11 Community Health Services (n=63,796).

**Table S2.** Age and sex adjusted mean PM<sub>10</sub> and NO<sub>2</sub> concentrations (µg/m<sup>3</sup>) at 4 digit postal code level for selected behavioral chronic disease factors among participants of the 2003 to 2005 surveys of 11 Community Health Services (n=63,796).

**Table S3.** Age and sex adjusted mean PM<sub>10</sub> and NO<sub>2</sub> concentrations (µg/m<sup>3</sup>) at 4-digit postal code level for selected behavioral chronic disease factors among participants of the 2003 to 2005 surveys of 11 Municipal Health Services. Also adjusted for marital status, region of origin<sup>a</sup>, education, and neighborhood social status-score (n=61,121).

**Table S4.** Percentages per decile of PM<sub>10</sub> and NO<sub>2</sub> concentrations (µg/m<sup>3</sup>) at 4-digit postal code level for selected behavioral chronic disease factors among participants of the 2003 to 2005 surveys of 11 Municipal Health Services.

**Table S5.** Hazard ratios and 95% confidence intervals per 10 µg/m<sup>3</sup> increase in PM<sub>10</sub> concentrations at the home address in 2001 of the whole study population for natural mortality, mortality from circulatory diseases, mortality from respiratory diseases, and lung cancer mortality.

**Table S6.** Summary of main cohort characteristics of registry based cohort studies, recently published European cohort studies and Dutch NLCS study.

References to sources cited in Table S6

**Table S1.** Age and sex adjusted mean PM<sub>10</sub> and NO<sub>2</sub> concentrations (µg/m<sup>3</sup>) at 4-digit postal code level for selected socio-demographic characteristics among participants of the 2003 to 2005 surveys of 11 Community Health Services (n=63,796).

| Characteristic        | N      | Mean PM <sub>10</sub> | (95% CI)        | Mean NO <sub>2</sub> | (95%CI)         |
|-----------------------|--------|-----------------------|-----------------|----------------------|-----------------|
| <b>Sex</b>            |        |                       |                 |                      |                 |
| Male                  | 29,103 | 29.40                 | (29.38 - 29.42) | 31.81                | (31.74 - 31.88) |
| Female                | 34,693 | 29.33                 | (29.31 -29.35)  | 31.71                | (31.66 - 31.78) |
| <b>Age</b>            |        |                       |                 |                      |                 |
| 30-34                 | 6,931  | 29.46                 | (29.42 -29.50)  | 32.23                | (32.10 - 32.37) |
| 24-39                 | 8,911  | 29.40                 | (29.37 -29.44)  | 31.65                | (31.54 - 31.77) |
| 40-44                 | 9,812  | 29.35                 | (29.32 - 29.39) | 31.46                | (31.35 - 31.58) |
| 45-49                 | 9,738  | 29.40                 | (29.36 -29.43)  | 31.63                | (31.51 - 31.74) |
| 50-54                 | 9,544  | 29.39                 | (29.35 -29.42)  | 31.73                | (31.61 - 31.84) |
| 55-59                 | 10,563 | 29.29                 | (29.25 -29.32)  | 31.93                | (31.82 - 32.03) |
| 60-65                 | 8,297  | 29.28                 | (29.24 -29.32)  | 31.71                | (31.59 - 31.84) |
| <b>Marital status</b> |        |                       |                 |                      |                 |
| Married               | 47,593 | 29.33                 | (29.31 -29.34)  | 31.29                | (31.24 - 31.35) |
| Living together       | 6,113  | 29.37                 | (29.33 -29.42)  | 32.36                | (32.22 - 32.51) |
| Divorced              | 3,906  | 29.56                 | (29.51 -29.62)  | 33.88                | (33.71 - 34.06) |
| Single                | 4,676  | 29.53                 | (29.49 -29.58)  | 33.61                | (33.45 - 33.78) |
| Widowed               | 1,285  | 29.57                 | (29.48 -29.67)  | 31.99                | (31.67 - 32.30) |
| missing               | 223    |                       |                 |                      |                 |
| <b>Origin</b>         |        |                       |                 |                      |                 |
| Dutch                 | 57,297 | 29.36                 | (29.35 -29.37)  | 31.43                | (31.38 - 31.48) |
| Non-Dutch, western    | 2,771  | 28.96                 | (28.90 -29.02)  | 33.15                | (32.94 - 33.36) |
| non western           | 2,769  | 29.66                 | (29.59 -29.72)  | 36.94                | (36.73 - 37.15) |
| missing               | 959    |                       |                 |                      |                 |
| <b>Education</b>      |        |                       |                 |                      |                 |
| Higher                | 15,755 | 29.29                 | (29.27 -29.33)  | 32.17                | (32.08 - 32.26) |
| Intermediate          | 17,811 | 29.28                 | (29.25 -29.30)  | 31.34                | (31.26 - 31.43) |
| Lower                 | 23,733 | 29.40                 | (29.38 -29.42)  | 31.46                | (31.39 - 31.53) |
| Primary               | 4,767  | 29.72                 | (29.67 -29.77)  | 33.25                | (33.08 - 33.41) |
| missing               | 1,730  |                       |                 |                      |                 |

**Table S2.** Age and sex adjusted mean PM<sub>10</sub> and NO<sub>2</sub> concentrations (µg/m<sup>3</sup>) at 4 digit postal code level for selected behavioral chronic disease factors among participants of the 2003 to 2005 surveys of 11 Community Health Services (n=63.796).

| Characteristic                                          | N      | Mean PM <sub>10</sub> | (95% CI)        | Mean NO <sub>2</sub> | (95%CI)         |
|---------------------------------------------------------|--------|-----------------------|-----------------|----------------------|-----------------|
| <b>Smoking</b>                                          |        |                       |                 |                      |                 |
| Current smoker                                          | 17,251 | 29.46                 | (29.43 - 29.48) | 32.31                | (32.22 - 32.39) |
| Former smoker                                           | 22,961 | 29.34                 | (29.32 - 29.37) | 31.43                | (31.35 - 31.51) |
| Never smoker                                            | 22,966 | 29.32                 | (29.29 - 29.34) | 31.67                | (31.59 - 31.74) |
| missing                                                 | 618    |                       |                 |                      |                 |
| <b>BMI</b>                                              |        |                       |                 |                      |                 |
| BMI<18.5                                                | 649    | 29.60                 | (29.47 - 29.74) | 32.55                | (32.12 - 32.99) |
| 18.5<BMI<25                                             | 30,713 | 29.34                 | (29.32 - 29.36) | 31.60                | (31.54 - 31.67) |
| 25<BMI<30                                               | 23,068 | 29.37                 | (29.35 - 29.39) | 31.76                | (31.69 - 31.84) |
| BMI>30                                                  | 7,506  | 29.52                 | (29.48 - 29.56) | 32.40                | (32.27 - 32.52) |
| missing                                                 | 1,860  |                       |                 |                      |                 |
| <b>Exercise (complies to standard)<sup>a</sup></b>      |        |                       |                 |                      |                 |
| Yes                                                     | 30,743 | 28.83                 | (28.81 - 28.85) | 31.19                | (31.13 - 31.26) |
| No                                                      | 17,649 | 28.87                 | (28.85 - 28.89) | 31.71                | (31.63 - 31.80) |
| Missing <sup>b</sup>                                    | 15,404 |                       |                 |                      |                 |
| <b>Alcohol use (compliance to criteria<sup>c</sup>)</b> |        |                       |                 |                      |                 |
| Does not drink                                          | 8,810  | 29.41                 | (29.37 - 29.45) | 32.63                | (32.51 - 32.75) |
| Complies to all 3 criteria                              | 30,366 | 29.32                 | (29.30 - 29.34) | 31.57                | (31.50 - 31.63) |
| Exceeds 1-2 criteria                                    | 17,513 | 29.36                 | (29.33 - 29.38) | 31.57                | (31.48 - 31.66) |
| Exceeds all 3 criteria                                  | 2,6452 | 29.42                 | (29.36 - 29.49) | 32.36                | (32.14 - 32.57) |
| missing                                                 | 4,455  |                       |                 |                      |                 |

<sup>a</sup>Compliance to 30 minutes of moderate exercise per day on at least 5 days per week. <sup>b</sup>Not available for 2 of the 11 surveys. <sup>c</sup>Criteria for responsible alcohol use:

1. men: a maximum of 21 glasses per week; women: a maximum of 14 glasses per week
2. men: a maximum of 5 glasses per drinking day; women: a maximum of 3 glasses per drinking day
3. maximum 5 drinking days per week

**Table S3.** Age and sex adjusted mean PM<sub>10</sub> and NO<sub>2</sub> concentrations (µg/m<sup>3</sup>) at 4-digit postal code level for selected behavioral chronic disease factors among participants of the 2003 to 2005 surveys of 11 Municipal Health Services. Also adjusted for marital status, region of origin<sup>a</sup>, education, and neighborhood social status-score (n=61.121).

| Characteristic                                          | N      | Mean PM <sub>10</sub> | (95% CI)        | Mean NO <sub>2</sub> | (95%CI)         |
|---------------------------------------------------------|--------|-----------------------|-----------------|----------------------|-----------------|
| <b>Smoking</b>                                          |        |                       |                 |                      |                 |
| Current smoker                                          | 16,454 | 29.45                 | (29.39 - 29.51) | 35.91                | (35.71 - 36.11) |
| Former smoker                                           | 22,079 | 29.41                 | (29.35 - 29.47) | 35.42                | (35.23 - 35.62) |
| Never smoker                                            | 22,043 | 29.38                 | (29.32 - 29.44) | 35.45                | (35.26 - 35.65) |
| missing                                                 | 545    |                       |                 |                      |                 |
| <b>BMI</b>                                              |        |                       |                 |                      |                 |
| BMI<18.5                                                | 617    | 29.57                 | (29.43 - 29.72) | 35.97                | (35.51 - 36.44) |
| 18.5<BMI<25                                             | 29,593 | 29.38                 | (29.32 - 29.44) | 35.39                | (35.19 - 35.58) |
| 25<BMI<30                                               | 22,172 | 29.39                 | (29.32 - 29.45) | 35.53                | (35.33 - 35.73) |
| BMI>30                                                  | 7,164  | 29.48                 | (29.41 - 29.54) | 35.85                | (35.63 - 36.07) |
| missing                                                 | 1,575  |                       |                 |                      |                 |
| <b>Exercise (complies to standard)<sup>b</sup></b>      |        |                       |                 |                      |                 |
| Yes                                                     | 29,884 | 29.44                 | (29.38 - 29.50) | 35.66                | (35.45 - 35.88) |
| No                                                      | 17,003 | 29.45                 | (29.39 - 29.51) | 35.84                | (35.62 - 36.06) |
| Missing <sup>c</sup>                                    | 14,234 |                       |                 |                      |                 |
| <b>Alcohol use (compliance to criteria<sup>d</sup>)</b> |        |                       |                 |                      |                 |
| Does not drink                                          | 8,170  | 29.37                 | (29.30 - 29.43) | 35.75                | (35.54 - 35.96) |
| Complies to all 3 criteria                              | 29,326 | 29.43                 | (29.36 - 29.49) | 35.54                | (35.34 - 35.75) |
| Exceeds 1-2 criteria                                    | 16,981 | 29.47                 | (29.41 - 29.54) | 35.58                | (35.37 - 35.79) |
| Exceeds all 3 criteria                                  | 2,559  | 29.50                 | (29.41 - 29.59) | 36.22                | (35.94 - 36.51) |
| missing                                                 | 4,085  |                       |                 |                      |                 |

<sup>a</sup>The data about origin distinguishes between Dutch, western origin, and non-western origin.

Individuals of non-western origin are those born in or with a parent born in Africa, Asia (except Japan and Indonesia, who are categorised as “western origin”), or Latin America. Given the relative large size of groups within non-western origin a distinction is made between Turkey, Morocco, and Surinam origin. <sup>b</sup>Compliance to 30 minutes of moderate exercise per day on at least 5 days per week. <sup>c</sup>Not

available for 2 of the 11 surveys. <sup>d</sup>Criteria for responsible alcohol use:

1. men: a maximum of 21 glasses per week; women: a maximum of 14 glasses per week
2. men: a maximum of 5 glasses per drinking day; women: a maximum of 3 glasses per drinking day
3. maximum 5 drinking days per week

**Table S4.** Percentages per decile of PM<sub>10</sub> and NO<sub>2</sub> concentrations (µg/m<sup>3</sup>) at 4-digit postal code level for selected behavioral chronic disease factors among participants of the 2003 to 2005 surveys of 11 Municipal Health Services.

| Exposure category                | Current smoker | Former smoker | Never smoker | BMI <18.5 | BMI 18.5-25 | BMI 25-30 | BMI>30 | Dutch nationality | Low education | Mean social economic status score <sup>a</sup> |
|----------------------------------|----------------|---------------|--------------|-----------|-------------|-----------|--------|-------------------|---------------|------------------------------------------------|
| <b>PM<sub>10</sub></b>           |                |               |              |           |             |           |        |                   |               |                                                |
| 1 (<25.2 µg/m <sup>3</sup> )     | 27.8           | 36.6          | 35.6         | 1.0       | 52.0        | 36.6      | 10.3   | 92.4              | 6.1           | .37                                            |
| 2 (25.2-26.9 µg/m <sup>3</sup> ) | 24.6           | 35.5          | 39.9         | 0.9       | 51.8        | 36.7      | 10.6   | 90.4              | 5.7           | .31                                            |
| 3 (26.9-28.7 µg/m <sup>3</sup> ) | 23.7           | 36.8          | 39.5         | 1.0       | 49.4        | 38.2      | 11.4   | 91.8              | 6.0           | .32                                            |
| 4 (28.7-30.3 µg/m <sup>3</sup> ) | 24.3           | 37.7          | 38.0         | 1.0       | 49.8        | 37.8      | 11.5   | 90.3              | 6.8           | .36                                            |
| 5 (30.3-31.6 µg/m <sup>3</sup> ) | 27.0           | 38.6          | 34.4         | 0.8       | 48.9        | 37.7      | 12.6   | 91.2              | 7.2           | .35                                            |
| 6 (31.6-32.9 µg/m <sup>3</sup> ) | 26.3           | 36.8          | 36.9         | 1.0       | 48.9        | 37.1      | 13.1   | 89.6              | 7.7           | .35                                            |
| 7 (32.9-34.3 µg/m <sup>3</sup> ) | 26.6           | 37.2          | 36.2         | 0.8       | 49.5        | 38.1      | 11.6   | 91.3              | 7.1           | .36                                            |
| 8 (34.3-36.5 µg/m <sup>3</sup> ) | 28.1           | 36.6          | 35.3         | 1.2       | 49.6        | 37.0      | 12.1   | 89.1              | 8.9           | .37                                            |
| 9 (36.5-39.0 µg/m <sup>3</sup> ) | 30.1           | 34.4          | 35.5         | 1.2       | 48.7        | 36.8      | 13.4   | 89.4              | 10.8          | .42                                            |
| 10 (>39.0 µg/m <sup>3</sup> )    | 34.7           | 33.3          | 32.1         | 1.5       | 47.4        | 36.4      | 14.6   | 96.6              | 10.7          | .43                                            |
| <b>NO<sub>2</sub></b>            |                |               |              |           |             |           |        |                   |               |                                                |
| 1 (<27.7 µg/m <sup>3</sup> )     | 24.7           | 38.4          | 36.9         | 0.8       | 50.9        | 37.5      | 10.8   | 96.3              | 5.9           | .37                                            |
| 2 (27.7-28.4 µg/m <sup>3</sup> ) | 24.3           | 38.2          | 37.5         | 0.9       | 52.0        | 36.3      | 10.7   | 94.8              | 6.2           | .35                                            |
| 3 (28.4-28.9 µg/m <sup>3</sup> ) | 25.7           | 37.9          | 36.9         | 0.9       | 50.0        | 37.9      | 11.2   | 94.9              | 6.7           | .35                                            |
| 4 (28.9-29.2 µg/m <sup>3</sup> ) | 25.1           | 37.3          | 37.6         | 1.1       | 50.9        | 36.5      | 11.5   | 94.1              | 6.5           | .34                                            |
| 5 (29.2-29.5 µg/m <sup>3</sup> ) | 26.7           | 37.4          | 35.9         | 1.0       | 50.2        | 37.4      | 11.3   | 92.1              | 6.9           | .33                                            |
| 6 (29.5-29.7 µg/m <sup>3</sup> ) | 25.4           | 36.8          | 37.9         | 1.0       | 49.8        | 37.8      | 11.3   | 91.9              | 6.5           | .32                                            |
| 7 (29.7-30.0 µg/m <sup>3</sup> ) | 27.6           | 37.1          | 35.3         | 1.1       | 49.9        | 37.2      | 11.9   | 93.4              | 6.6           | .35                                            |
| 8 (30.0-30.6 µg/m <sup>3</sup> ) | 29.4           | 34.9          | 35.7         | 1.1       | 49.7        | 36.6      | 12.6   | 91.0              | 8.7           | .36                                            |
| 9 (30.6-31.4 µg/m <sup>3</sup> ) | 31.1           | 34.0          | 34.9         | 1.4       | 45.1        | 38.3      | 15.2   | 87.3              | 10.2          | .41                                            |
| 10 (>31.4 µg/m <sup>3</sup> )    | 33.1           | 31.4          | 35.5         | 1.2       | 47.4        | 36.7      | 14.6   | 75.9              | 12.9          | .45                                            |

<sup>a</sup>Mean SES-ranking of postal code areas in exposure group (0: highest SES; 1: lowest SES).

**Table S5.** Hazard ratios and 95% confidence intervals per 10  $\mu\text{g}/\text{m}^3$  increase in  $\text{PM}_{10}$  concentrations at the home address in 2001 of the whole study population for natural mortality, mortality from circulatory diseases, mortality from respiratory diseases, and lung cancer mortality.

|                        | <b>PM<sub>10</sub></b> |                             |                             |                     |
|------------------------|------------------------|-----------------------------|-----------------------------|---------------------|
| <b>Model</b>           | <b>Natural causes</b>  | <b>Circulatory diseases</b> | <b>Respiratory diseases</b> | <b>Lung cancer</b>  |
| Full model             | 1.08<br>1.07 – 1.09    | 1.06<br>1.04 – 1.08         | 1.13<br>1.10 – 1.17         | 1.26<br>1.21 – 1.30 |
| Smoking adjusted model | 1.06<br>1.05 – 1.07    | 1.03<br>1.01 – 1.06         | 1.08<br>1.04 – 1.12         | 1.16<br>1.11 – 1.20 |
|                        | <b>NO<sub>2</sub></b>  |                             |                             |                     |
| Full model             | 1.03<br>1.02 – 1.03    | 1.00<br>0.99 – 1.01         | 1.02<br>1.01 – 1.03         | 1.10<br>1.09 – 1.11 |
| Smoking adjusted model | 1.02<br>1.02 – 1.03    | 0.99<br>0.99 – 1.00         | 1.00<br>0.99 – 1.01         | 1.08<br>1.07 – 1.10 |

Full model: Adjusted for age, gender, marital status, region of origin, standardised household income, and neighbourhood (postcode) measure for social status (full model results correspond to the values shown in Tables 2 and 3).

Smoking adjusted model: Adjusted for age, gender, marital status, region of origin, standardised household income, neighbourhood (postcode) measure for social status (mean SES-ranking of postal code areas in exposure group (0: highest SES; 1: lowest SES)), and regional (NUTS-3) age-standardised smoking-attributable mortality.

**Table S6.** Summary of main cohort characteristics of registry based cohort studies, recently published European cohort studies and Dutch NLCS study.

| Study                        | Location        | Cohort                    | Size         | Exposure                                                                       | Air pollutants                                           | Non-accidental HR (95% CI)                                  | Cardiovascular HR (95% CI)                                  | Respiratory HR (95% CI)                                     | Lung Cancer HR (95% CI)                                     |
|------------------------------|-----------------|---------------------------|--------------|--------------------------------------------------------------------------------|----------------------------------------------------------|-------------------------------------------------------------|-------------------------------------------------------------|-------------------------------------------------------------|-------------------------------------------------------------|
| Carey et al. 2013            | England         | Population 40 – 89 years  | 830842       | Dispersion models, 1 x 1 km grid                                               | PM <sub>10</sub> , PM <sub>2.5</sub> , NO <sub>2</sub>   | 1.07 (0.99, 1.16)<br>1.13 (1.00, 1.27)<br>1.02 (1.00, 1.05) | 1.00 (0.91, 1.10)<br>1.00 (0.86, 1.17)<br>1.00 (0.97, 1.03) | 1.29 (1.14, 1.46)<br>1.57 (1.30, 1.90)<br>1.08 (1.04, 1.13) | 1.03 (0.88, 1.21)<br>1.11 (0.86, 1.43)<br>1.06 (1.00, 1.11) |
| Cesaroni et al. 2013         | Rome, Italy     | Population ≥ 30 years     | 1265058      | PM <sub>2.5</sub> : dispersion 1 x 1 km grid<br>NO <sub>2</sub> : LUR, address | PM <sub>2.5</sub><br>NO <sub>2</sub>                     | 1.04 (1.03, 1.05)<br>1.03 (1.02, 1.03)                      | 1.06 (1.04, 1.08)<br>1.03 (1.02, 1.04)                      | 1.03 (0.97, 1.08)<br>1.03 (1.00, 1.06)                      | 1.05 (1.01, 1.10)<br>1.04 (1.02, 1.07)                      |
| Chen et al. 2013             | Ontario, Canada | Population 35 – 85 years  | 205440       | LUR address                                                                    | NO <sub>2</sub>                                          |                                                             | 1.09 (1.05, 1.12)                                           |                                                             |                                                             |
| Crouse et al. 2012           | Canada          | Population ≥ 25 years     | 2145400      | City mean or 10 x 10 km grids                                                  | PM <sub>2.5</sub>                                        | 1.10 (1.05, 1.15)                                           | 1.15 (1.07, 1.24)                                           |                                                             |                                                             |
| Huss et al. 2010             | Switzerland     | Population ≥ 30 years     | 4580311      | Dispersion models, 200 x 200 m grids                                           | PM <sub>10</sub>                                         |                                                             | 1.00 (0.99, 1.00)                                           |                                                             | 1.05 (1.03, 1.06)                                           |
| Hales et al. 2012            | New Zealand     | Population 30 – 74 years  | 1065645      | LUR, census area, quintiles of exposure                                        | PM <sub>10</sub>                                         | 1.07 (1.04, 1.10)                                           | 1.06 (1.01, 1.12)                                           | 1.14 (1.05, 1.23)<br>Includes lung cancer                   | 1.16 (1.04, 1.29)                                           |
| Zeger et al. 2008            | USA             | Medicare MCAPS ≥ 65 years | 19.1 million | ZIP-code average                                                               | PM <sub>2.5</sub><br>Eastern<br>Central<br>Western       | 1.11 (1.08, 1.13)<br>1.09 (1.05, 1.13)<br>1.00 (0.98, 1.02) |                                                             |                                                             |                                                             |
| Fischer et al. (this paper)  | Netherlands     | Population ≥ 30 years     | 7218363      | LUR, 100 x 100 m                                                               | PM <sub>10</sub><br>NO <sub>2</sub>                      | 1.08 (1.07, 1.09)<br>1.03 (1.02, 1.03)                      | 1.06 (1.04, 1.08)<br>1.00 (0.99, 1.01)                      | 1.13 (1.10, 1.17)<br>1.02 (1.01, 1.03)                      | 1.26 (1.21, 1.30)<br>1.10 (1.09, 1.10)                      |
| Beelen et al. 2008           | Netherlands     | Cohort ≥55 years          | 117528       | LUR, address                                                                   | PM <sub>2.5</sub><br>NO <sub>2</sub>                     | 1.06 (0.97, 1.16)<br>1.03 (1.00, 1.05)                      | 1.04 (0.90, 1.21)<br>1.02 (0.98, 1.07)                      | 1.07 (0.75, 1.52)<br>1.11 (1.00, 1.23)                      | 1.06 (0.82, 1.38)<br>0.97 (0.90, 1.05)                      |
| Beelen et al. 2013           | Europe          | Cohorts                   | 367251       | LUR, address                                                                   | PM <sub>10</sub><br>PM <sub>2.5</sub><br>NO <sub>2</sub> | 1.04 (1.00, 1.09)<br>1.07 (1.02, 1.13)<br>1.01 (0.99, 1.03) |                                                             |                                                             |                                                             |
| Raaschou-Nielsen et al. 2013 | Europe          | Cohorts                   | 312944       | LUR, address                                                                   | PM <sub>10</sub><br>PM <sub>2.5</sub><br>NO <sub>2</sub> |                                                             |                                                             |                                                             | 1.22 (1.03, 1.45)<br>1.39 (0.91, 2.13)<br>0.99 (0.93, 1.06) |
| Dimakopoulou et al. 2014     | Europe          | Cohorts                   | 307553       | LUR, address                                                                   | PM <sub>10</sub><br>PM <sub>2.5</sub><br>NO <sub>2</sub> |                                                             |                                                             | 0.86 (0.67, 1.04)<br>0.79 (0.50, 1.25)<br>0.97 (0.89, 1.05) |                                                             |
| Beelen et al. 2014           | Europe          | Cohorts                   | 367383       | LUR, address                                                                   | PM <sub>10</sub><br>PM <sub>2.5</sub><br>NO <sub>2</sub> |                                                             | 1.02 (0.92, 1.14)<br>0.98 (0.82, 1.17)<br>1.01 (0.97, 1.06) |                                                             |                                                             |

## References to sources cited in Table S6

- Beelen, R., G. Hoek, P. A. van den Brandt, R. A. Goldbohm, P. Fischer, L. J. Schouten, M. Jerrett, E. Hughes, B. Armstrong and B. Brunekreef (2008). "Long-term effects of traffic-related air pollution on mortality in a Dutch cohort (NLCS-AIR study)." *Environ Health Perspect* **116**(2): 196-202.
- Beelen, R., O. Raaschou-Nielsen, M. Stafoggia, Z. J. Andersen, G. Weinmayr, B. Hoffmann, K. Wolf, E. Samoli, P. Fischer, M. Nieuwenhuijsen, P. Vineis, W. W. Xun, K. Katsouyanni, K. Dimakopoulou, A. Oudin, B. Forsberg, L. Modig, A. S. Havulinna, T. Lanki, A. Turunen, B. Oftedal, W. Nystad, P. Nafstad, U. De Faire, N. L. Pedersen, C. G. Ostenson, L. Fratiglioni, J. Penell, M. Korek, G. Pershagen, K. T. Eriksen, K. Overvad, T. Ellermann, M. Eeftens, P. H. Peeters, K. Meliefste, M. Wang, B. Bueno-de-Mesquita, D. Sugiri, U. Kramer, J. Heinrich, K. de Hoogh, T. Key, A. Peters, R. Hampel, H. Concin, G. Nagel, A. Ineichen, E. Schaffner, N. Probst-Hensch, N. Kunzli, C. Schindler, T. Schikowski, M. Adam, H. Phuleria, A. Vilier, F. Clavel-Chapelon, C. Declercq, S. Grioni, V. Krogh, M. Y. Tsai, F. Ricceri, C. Sacerdote, C. Galassi, E. Migliore, A. Ranzi, G. Cesaroni, C. Badaloni, F. Forastiere, I. Tamayo, P. Amiano, M. Dorronsoro, M. Katsoulis, A. Trichopoulou, B. Brunekreef and G. Hoek (2014). "Effects of long-term exposure to air pollution on natural-cause mortality: an analysis of 22 European cohorts within the multicentre ESCAPE project." *Lancet* **383**(9919): 785-795.
- Beelen, R., M. Stafoggia, O. Raaschou-Nielsen, Z. J. Andersen, W. W. Xun, K. Katsouyanni, K. Dimakopoulou, B. Brunekreef, G. Weinmayr, B. Hoffmann, K. Wolf, E. Samoli, D. Houthuijs, M. Nieuwenhuijsen, A. Oudin, B. Forsberg, D. Olsson, V. Salomaa, T. Lanki, T. Yli-Tuomi, B. Oftedal, G. Aamodt, P. Nafstad, U. De Faire, N. L. Pedersen, C. G. Ostenson, L. Fratiglioni, J. Penell, M. Korek, A. Pyko, K. T. Eriksen, A. Tjønneland, T. Becker, M. Eeftens, M. Bots, K. Meliefste, M. Wang, B. Bueno-de-Mesquita, D. Sugiri, U. Kramer, J. Heinrich, K. de Hoogh, T. Key, A. Peters, J. Cyrys, H. Concin, G. Nagel, A. Ineichen, E. Schaffner, N. Probst-Hensch, J. Dratva, R. Ducret-Stich, A. Vilier, F. Clavel-Chapelon, M. Stempfelet, S. Grioni, V. Krogh, M. Y. Tsai, A. Marcon, F. Ricceri, C. Sacerdote, C. Galassi, E. Migliore, A. Ranzi, G. Cesaroni, C. Badaloni, F. Forastiere, I. Tamayo, P. Amiano, M. Dorronsoro, M. Katsoulis, A. Trichopoulou, P. Vineis and G. Hoek (2014).

- "Long-term Exposure to Air Pollution and Cardiovascular Mortality: An Analysis of 22 European Cohorts." *Epidemiology* **25**(3): 368-378.
- Cesaroni, G., C. Badaloni, C. Gariazzo, M. Stafoggia, R. Sozzi, M. Davoli and F. Forastiere (2013). "Long-term exposure to urban air pollution and mortality in a cohort of more than a million adults in Rome." *Environ Health Perspect* **121**(3): 324-331.
- Chen, H., M. S. Goldberg, R. T. Burnett, M. Jerrett, A. J. Wheeler and P. J. Villeneuve (2013). "Long-term exposure to traffic-related air pollution and cardiovascular mortality." *Epidemiology* **24**(1): 35-43.
- Crouse, D. L., P. A. Peters, A. van Donkelaar, M. S. Goldberg, P. J. Villeneuve, O. Brion, S. Khan, D. O. Atari, M. Jerrett, C. A. Pope, M. Brauer, J. R. Brook, R. V. Martin, D. Stieb and R. T. Burnett (2012). "Risk of nonaccidental and cardiovascular mortality in relation to long-term exposure to low concentrations of fine particulate matter: a Canadian national-level cohort study." *Environ Health Perspect* **120**(5): 708-714.
- Dimakopoulou, K., E. Samoli, R. Beelen, M. Stafoggia, Z. Jovanovic Andersen, B. Hoffmann, P. Fischer, M. Nieuwenhuijsen, P. Vineis, W. Xun, G. Hoek, O. Raaschou-Nielsen, A. Oudin, B. Forsberg, L. Modig, P. Jousilahti, T. Lanki, A. Turunen, B. Oftedal, P. Nafstad, P. E. Schwarze, J. Penell, L. Fratiglioni, N. Andersson, N. Pedersen, M. Korek, U. De Faire, K. Thorup Eriksen, A. Tjønneland, T. Becker, M. Wang, B. Bueno-de-Mesquita, M.-Y. Tsai, M. Eeftens, P. H. Peeters, K. Meliefste, A. Marcon, U. Krämer, T. A. J. Kuhlbusch, M. Vossoughi, T. Key, K. de Hoogh, R. Hampel, A. Peters, J. Heinrich, G. Weinmayr, H. Concin, G. Nagel, A. Ineichen, B. Jacquemin, M. Stempfelet, A. Vilier, F. Ricceri, C. Sacerdote, X. Pedeli, M. Katsoulis, A. Trichopoulou, B. Brunekreef and K. Katsouyanni (2014). "Air Pollution and Non-Malignant Respiratory Mortality in 16 Cohorts within the ESCAPE Project." *American Journal of Respiratory and Critical Care Medicine*.
- Hales, S., T. Blakely and A. Woodward (2012). "Air pollution and mortality in New Zealand: cohort study." *J Epidemiol Community Health* **66**(5): 468-473.
- Huss, A., A. Spoerri, M. Egger, M. Roosli and G. Swiss National Cohort Study (2010). "Aircraft noise, air pollution, and mortality from myocardial infarction." *Epidemiology* **21**(6): 829-836.

Raaschou-Nielsen, O., Z. J. Andersen, R. Beelen, E. Samoli, M. Stafoggia, G. Weinmayr, B. Hoffmann, P. Fischer, M. J. Nieuwenhuijsen, B. Brunekreef, W. W. Xun, K. Katsouyanni, K. Dimakopoulou, J. Sommar, B. Forsberg, L. Modig, A. Oudin, B. Oftedal, P. E. Schwarze, P. Nafstad, U. De Faire, N. L. Pedersen, C. G. Ostenson, L. Fratiglioni, J. Penell, M. Korek, G. Pershagen, K. T. Eriksen, M. Sorensen, A. Tjonneland, T. Ellermann, M. Eeftens, P. H. Peeters, K. Meliefste, M. Wang, B. Bueno-de-Mesquita, T. J. Key, K. de Hoogh, H. Concin, G. Nagel, A. Vilier, S. Grioni, V. Krogh, M. Y. Tsai, F. Ricceri, C. Sacerdote, C. Galassi, E. Migliore, A. Ranzi, G. Cesaroni, C. Badaloni, F. Forastiere, I. Tamayo, P. Amiano, M. Dorronsoro, A. Trichopoulou, C. Bamia, P. Vineis and G. Hoek (2013). "Air pollution and lung cancer incidence in 17 European cohorts: prospective analyses from the European Study of Cohorts for Air Pollution Effects (ESCAPE)." Lancet Oncol **14**(9): 813-822.

Zeger, S. L., F. Dominici, A. McDermott and J. M. Samet (2008). "Mortality in the Medicare population and chronic exposure to fine particulate air pollution in urban centers (2000-2005)." Environ Health Perspect **116**(12): 1614-1619.
